# Supplementary material for: Mg ion pre-intercalated MnO2 nanospheres as high-performance cathode materials for aqueous Zn-ion batteries
Source: Royal Society of Chemistry journal article supplement (doi:10.1039/d2dt00047d), 2022-01-01
Supplement: d2dt00047d1.pdf [file d2dt00047d1.pdf]

## Supporting Information

### Mg ion pre-intercalated MnO<sub>2</sub> nanospheres as high-performance cathode materials for aqueous Zn-ion batteries

Pu Xu, Huimin Yi, Gejun Shi, Zhennan Xiong, Yingying Hu, Ruilin Wang, Huihui Zhang,

Baofeng Wang\*

Shanghai Key Laboratory of Materials Protection and Advanced Materials in Electric Power,  
Shanghai University of Electric Power, Shanghai 200090, China

E-mail address: [wangbaofeng@shiep.edu.cn](mailto:wangbaofeng@shiep.edu.cn)

#### Supplemental Figures and Table:

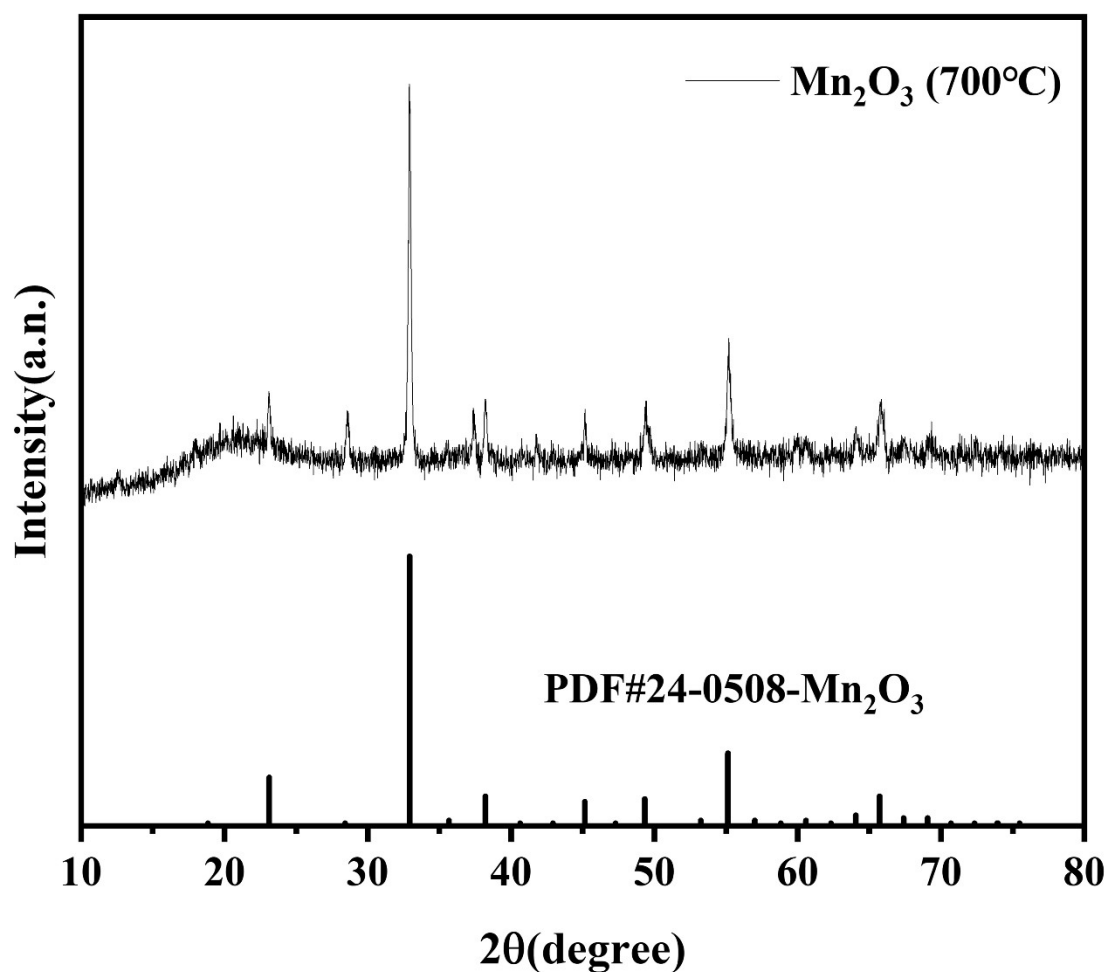

Figure S1. XRD patterns of the Mn<sub>2</sub>O<sub>3</sub>

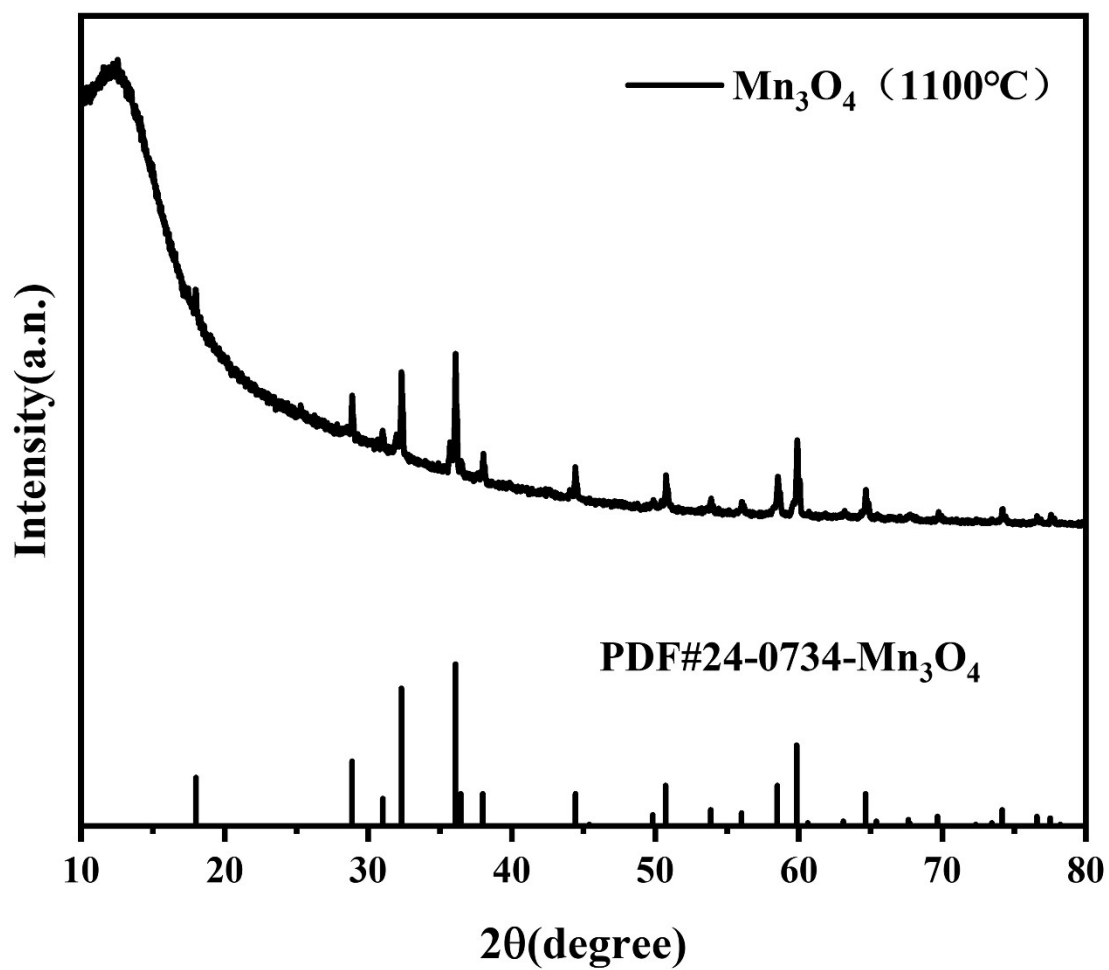

Figure S2. XRD patterns of the  $\text{Mn}_3\text{O}_4$

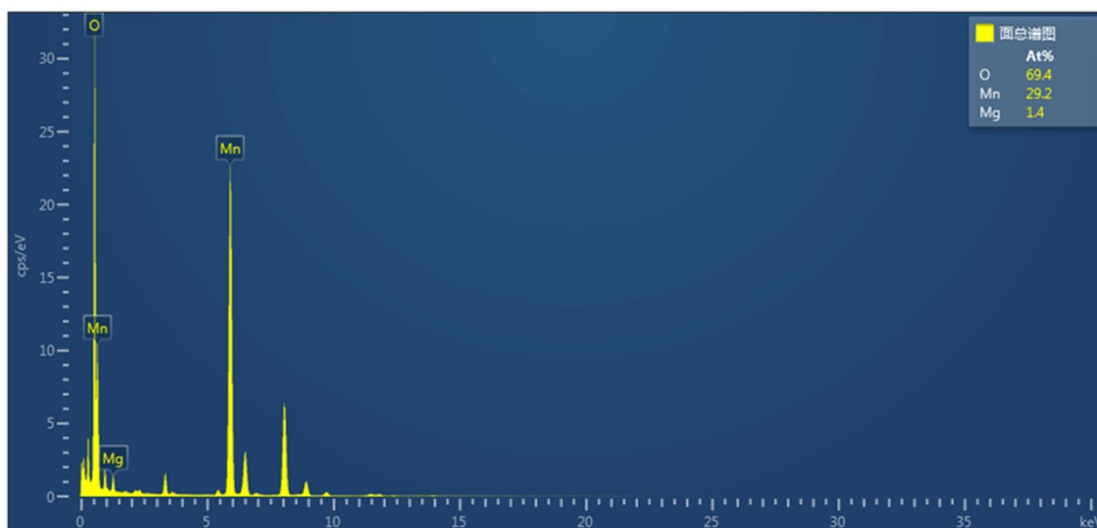

Figure S3. EDS pattern of the  $\text{MnO}_2$

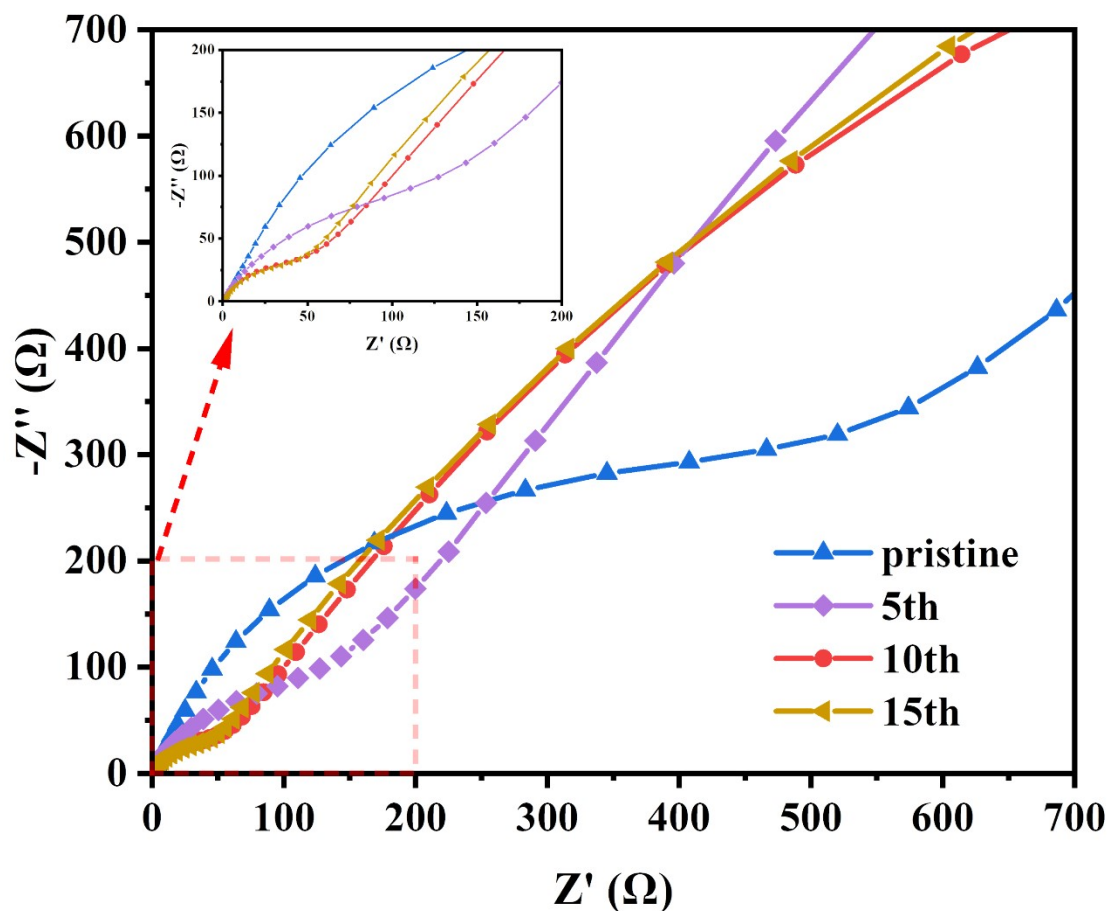

Figure S4. Nyquist plots of MnO<sub>2</sub> at different cycles

Table S1:

Electrochemical performance of MnO<sub>2</sub> as cathode materials for ZIBs.

| Cathode Material                    | Current density (mA/g) | Cycle number (n) | Capacity (mA h/g) | References       |
|-------------------------------------|------------------------|------------------|-------------------|------------------|
| $\alpha$ -MnO <sub>2</sub>          | 100                    | 50               | 96.8              | 1                |
| $\alpha$ -MnO <sub>2</sub> nanorods | 83                     | 50               | 160               | 2                |
| $\alpha$ -MnO <sub>2</sub>          | 300                    | 100              | 103               | 3                |
| $\alpha$ -MnO <sub>2</sub>          | 100                    | 300              | 140               | 4                |
| $\beta$ -MnO <sub>2</sub>           | 100                    | 100              | 105               | 5                |
| $\beta$ -MnO <sub>2</sub> nanorods  | 100                    | 50               | 150               | 6                |
| $\delta$ -MnO <sub>2</sub>          | 100                    | 100              | 96                | 5                |
| $\delta$ -MnO <sub>2</sub>          | 83                     | 100              | 112               | 7                |
| $\delta$ -MnO <sub>2</sub>          | 100                    | 150              | 45                | 8                |
| MnO <sub>2</sub> /CNT               | 155                    | 100              | 145               | 9                |
| MnO <sub>2</sub> @C                 | 66                     | 50               | 189               | 10               |
| <b>MnO<sub>2</sub></b>              | <b>300</b>             | <b>100</b>       | <b>247</b>        | <b>This work</b> |
| <b>MnO<sub>2</sub></b>              | <b>800</b>             | <b>800</b>       | <b>146</b>        | <b>This work</b> |

## References

1. X. Guo, J. Zhou, C. Bai, X. Li, G. Fang and S. Liang, *Materials Today Energy*, 2020, **16**, 100396.
2. M. H. Alfaruqi, J. Gim, S. Kim, J. Song, J. Jo, S. Kim, V. Mathew and J. Kim, *J. Power Sources*, 2015, **288**, 320–327.
3. A. S. Poyraz, J. Laughlin and Z. Zec, *Electrochim. Acta*, 2019, **305**, 423–432.
4. X. Gao, H. Wu, W. Li, Y. Tian, Y. Zhang, H. Wu, L. Yang, G. Zou, H. Hou and X. Ji, *Small*, 2020, **16**, 1905842.
5. C. Guo, Q. Zhou, H. Liu, S. Tian, B. Chen, J. Zhao and J. Li, *Electrochim. Acta*, 2019, **324**, 134867.
6. S. Islam, M. H. Alfaruqi, V. Mathew, J. Song, S. Kim, S. Kim, J. Jo, J. P. Baboo, D. T. Pham, D. Y. Putro, Y.-K. Sun and J. Kim, *Journal of Materials Chemistry A*, 2017, **5**, 23299–23309.
7. M. H. Alfaruqi, J. Gim, S. Kim, J. Song, P. Duong Tung, J. Jo, Z. Xiu, V. Mathew and J. Kim, *Electrochem. Commun.*, 2015, **60**, 121–125.
8. W. Kao-ian, R. Pornprasertsuk, P. Thamyongkit, T. Maiyalagan and S. Kheawhom, *J. Electrochem. Soc.*, 2019, **166**, A1063–A1069.
9. L. Zhao, L. Dong, W. Liu and C. Xu, *ChemistrySelect*, 2018, **3**, 12661–12665.
10. S. Islam, M. H. Alfaruqi, J. Song, S. Kim, D. T. Pham, J. Jo, S. Kim, V. Mathew, J. P. Baboo, Z. Xiu and J. Kim, *Journal of Energy Chemistry*, 2017, **26**, 815–819.
